# Supplementary material for: Biological context modulates virus-host dynamics and diversification
Source: Research Square preprint supplement (doi:10.21203/rs.3.rs-7825215/v1), 2025-11-06
Supplement: Supplementary file 1 [file 22b95626fefbb733f4a70ac6.docx]

Supplementary Tables: Biological context modulates virus–host dynamics and diversification

**Supplementary Table 1:** Host range of the viruses. Grey shading indicates the virus can produce plaques on the bacteria.

**Supplementary Table 2:** Number of mutations detected, mutation rates and ANIr values in the EM1 virus.

**Supplementary Table 3:** Number of mutations detected and mutation rates in the strain M1 exclusive genomic regions.

**Supplementary Table 4:** Primers used in the PCR for each target.

**Supplementary Table 5:** qPCR conditions.

**Supplementary Table 6:** Primers used for the metabarcoding.

**Supplementary Table 7:** PCR conditions for metabarcoding.
