# Supplementary material for: Biological context modulates virus-host dynamics and diversification
Source: Research Square preprint supplement (doi:10.21203/rs.3.rs-7825215/v1), 2025-11-06
Supplement: Supplementary file 2 [file 94d1ae8b2610a40337f6c74c.docx]

Supplementary Information: Biological context modulates virus–host dynamics and diversification


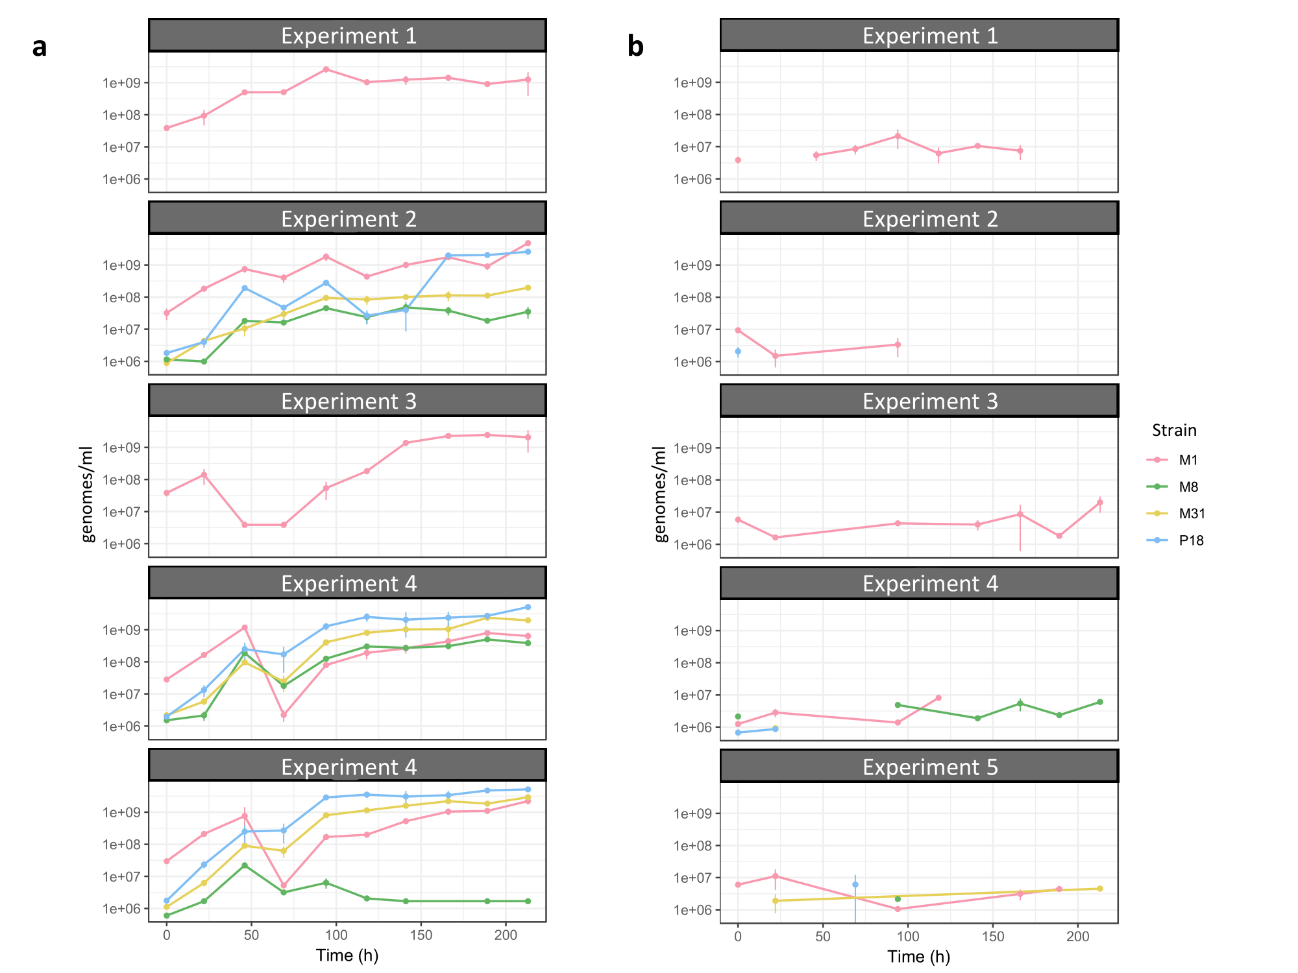
**Supplementary Fig. 1:** **a)** Genomes/ml of each strain in the whole culture in experiments 1, 2, 3, 4 and 5 (top to bottom) measured by microfluidics-based qPCR. **b)** Genomes/ml of each strain in the supernatant in experiments 1, 2, 3, 4 and 5 (top to bottom) measured by microfluidics-based qPCR. All experiments were performed in triplicate. Error bars represent the standard error of the biological replicates.


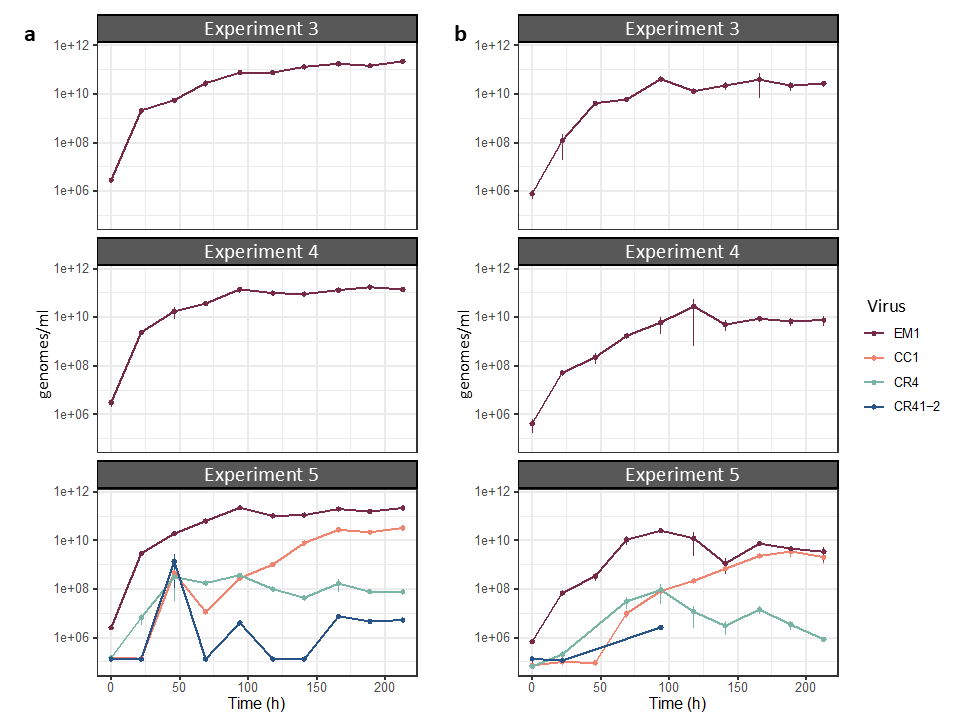
 **Supplementary Fig. 2:** Genomes/ml of each virus in the whole culture in experiments 3, 4 and 5 (top to bottom) measured by microfluidics-based qPCR. All experiments were performed in triplicate. Error bars represent the standard error of the biological replicates.


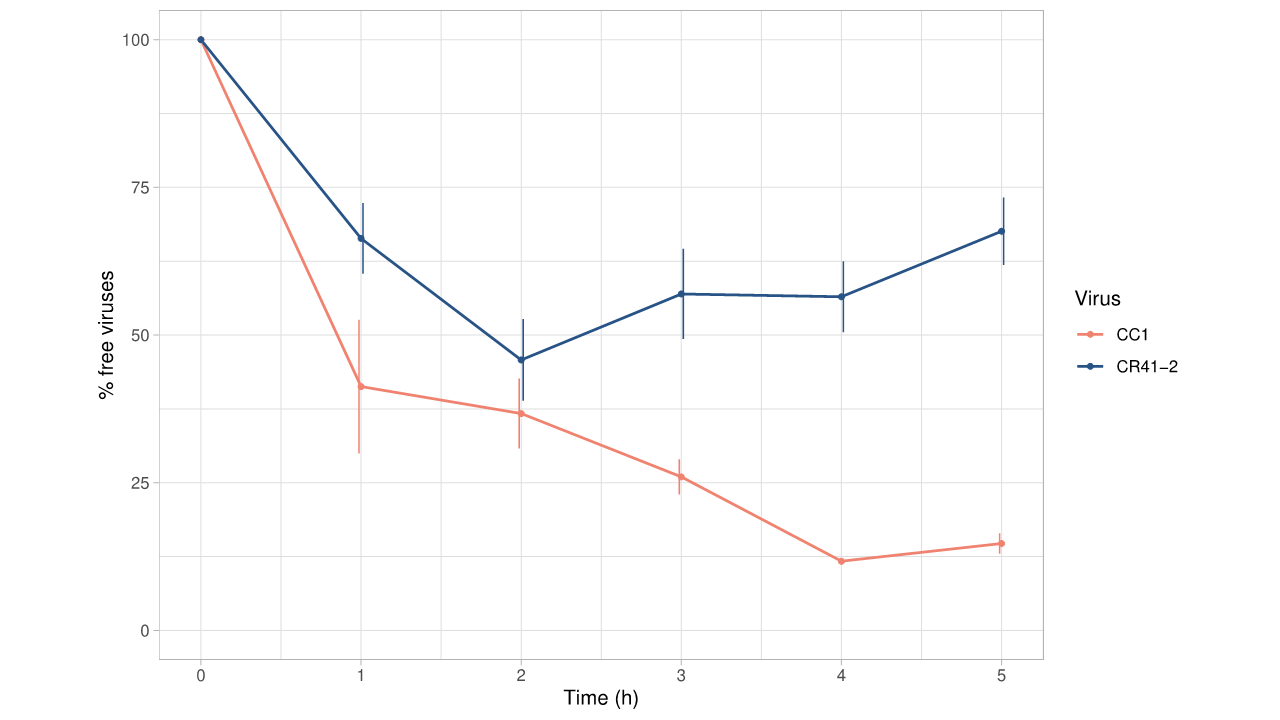
**Supplementary Fig. 3:** Adsorption experiments of CC1 and CR41-2 viruses to their M31 host. The y-axis represents the number of free viruses in the supernatant with respect to the initial viruses. All experiments were performed in triplicate. Error bars represent the standard error of the biological replicates.


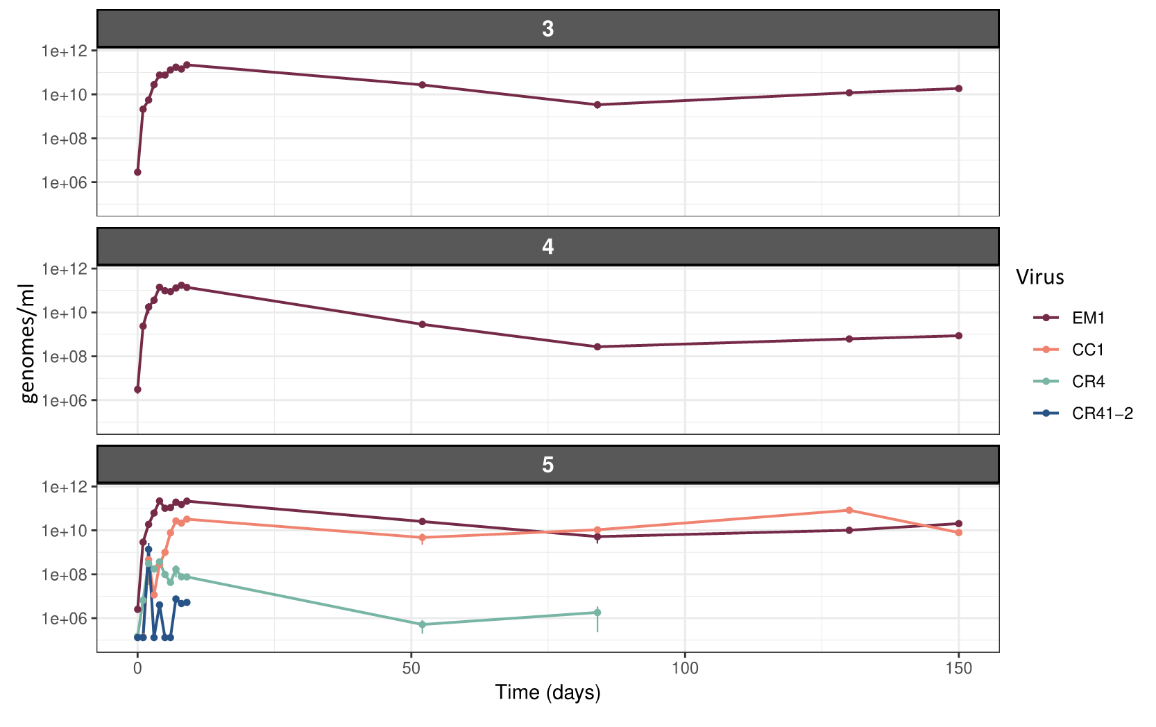
**Supplementary Fig. 4:** **Concentration of the different *Sal. ruber* viruses in the whole culture (extracellular and intracellular) in the long-term experiment.** Genomes/ml of each virus in the long-term in experiments 3, 4 and 5 (top to bottom) measured by qPCR. All experiments were performed in triplicate. Error bars represent the standard error of the biological replicates.


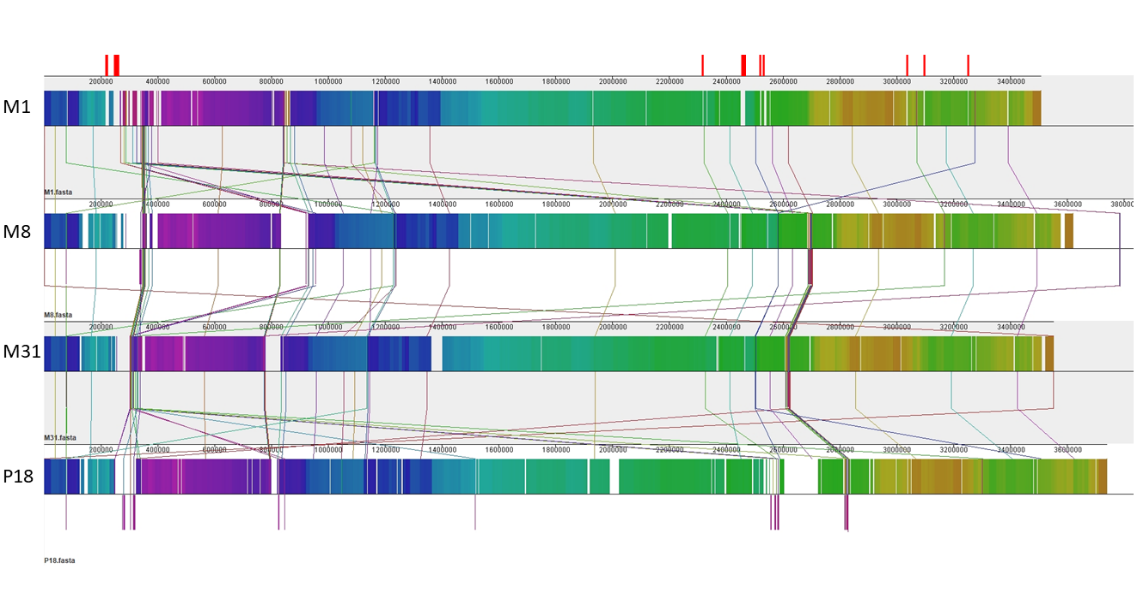
**Supplementary Fig. 5:** Alignment of strains M1, M8, M31 and P18 (from top to bottom). The genomic regions specific to M1 that were selected for mutation analysis are marked above in red.
